# Supplementary material for: Activation of αvβ3 Integrin Alters Fibronectin Fibril Formation in Human Trabecular Meshwork Cells in a ROCK-Independent Manner
Source: PubMed Central journal article supplement — Invest Ophthalmol Vis Sci. 2019 Sep;60(12):3897–913. doi: 10.1167/iovs.19-27171 (PMC6750892; doi:10.1167/iovs.19-27171), 2019-09
Supplement: iovs-60-12-02_s01.pdf [file iovs-60-12-02_s01.pdf]

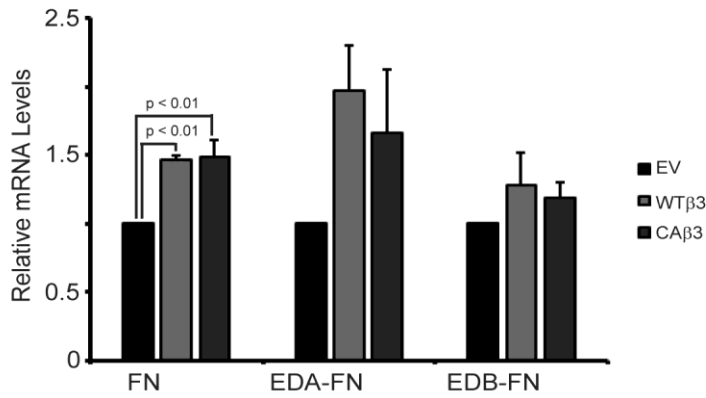

**Figure S1. qPCR analysis of fibronectin, EDA+ fibronectin and EDB+ fibronectin mRNA levels in EV, WTβ3 and CAβ3 TM-1 cells.** Levels of fibronectin mRNA were higher in WTβ3 and CAβ3 cells than EV cells (both  $p < 0.01$ ). Levels of EDA+ fibronectin or EDB+ fibronectin mRNA were not significantly different among the three cell lines. Data were pooled from three separate analyses and represent the mean  $\pm$  SE. Results were normalized to the housekeeping gene SDHA.
