# Supplementary material for: Activation of αvβ3 Integrin Alters Fibronectin Fibril Formation in Human Trabecular Meshwork Cells in a ROCK-Independent Manner
Source: PubMed Central journal article supplement — Invest Ophthalmol Vis Sci. 2019 Sep;60(12):3897–913. doi: 10.1167/iovs.19-27171 (PMC6750892; doi:10.1167/iovs.19-27171), 2019-09
Supplement: iovs-60-12-02_s02.pdf [file iovs-60-12-02_s02.pdf]

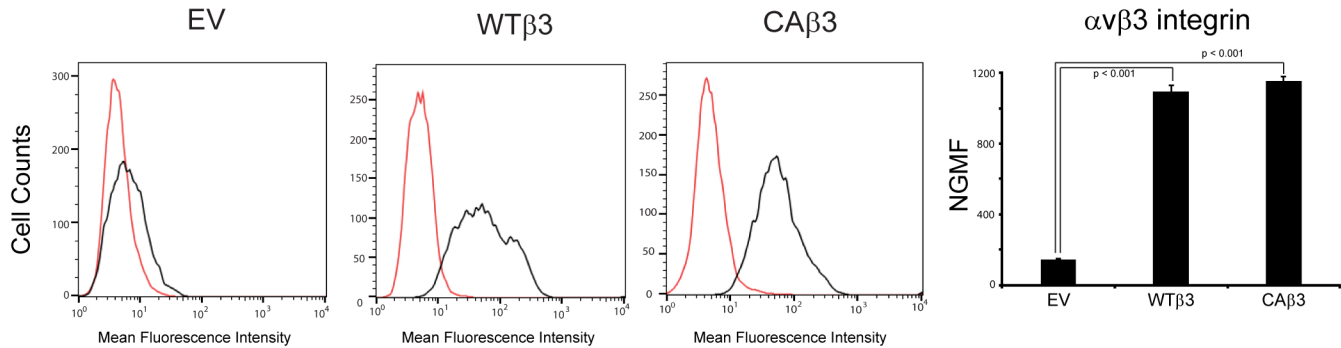

**Figure S2. Levels of  $\alpha v \beta 3$  integrin in CA $\beta 3$  cells and WT $\beta 3$  cells are not significantly different.** FACS analysis was performed on EV, WT $\beta 3$  and CA $\beta 3$  cells using mAb LM609 (black) against the  $\alpha v \beta 3$  integrin. Mouse IgG (red) was used as a control. Representative FACS profiles for each cell line are shown. Each profile is from one analysis using duplicate determinations. The normalized geometric mean fluorescence (NGMF) was determined by pooling data from two analyses, both using duplicate determinations ( $n = 4$ ). Both WT $\beta 3$  and CA $\beta 3$  NGMF was significantly greater than EV NGMF ( $p < 0.001$ ). There was no difference in the NGMF between the WT $\beta 3$  and CA $\beta 3$  cells. NGMF results represent the mean  $\pm$  SE.
