# Supplementary material for: Activation of αvβ3 Integrin Alters Fibronectin Fibril Formation in Human Trabecular Meshwork Cells in a ROCK-Independent Manner
Source: PubMed Central journal article supplement — Invest Ophthalmol Vis Sci. 2019 Sep;60(12):3897–913. doi: 10.1167/iovs.19-27171 (PMC6750892; doi:10.1167/iovs.19-27171), 2019-09
Supplement: iovs-60-12-02_s03.pdf [file iovs-60-12-02_s03.pdf]

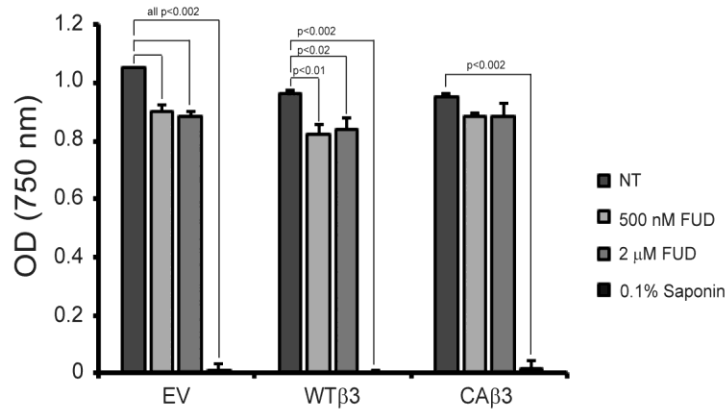

**Figure S3. MTT assay analysis of potential FUD-induced cytotoxicity in EV, WT $\beta$ 3 and CA $\beta$ 3 cells.** Cells were left untreated or were treated with 500 nM or 2  $\mu$ M FUD or 0.1% saponin for 24 hr prior to processing. FUD had minor, statistically significant cytotoxicity on EV and WT $\beta$ 3 cells at both concentration (all  $p < 0.02$ ). FUD had no significant cytotoxicity on CA $\beta$ 3 cells. Results are pooled from three separate assays with triplicate determinations ( $n = 9$ ) and represent the mean  $\pm$  SE.
