# Supplementary material for: Activation of αvβ3 Integrin Alters Fibronectin Fibril Formation in Human Trabecular Meshwork Cells in a ROCK-Independent Manner
Source: PubMed Central journal article supplement — Invest Ophthalmol Vis Sci. 2019 Sep;60(12):3897–913. doi: 10.1167/iovs.19-27171 (PMC6750892; doi:10.1167/iovs.19-27171), 2019-09
Supplement: iovs-60-12-02_s04.pdf [file iovs-60-12-02_s04.pdf]

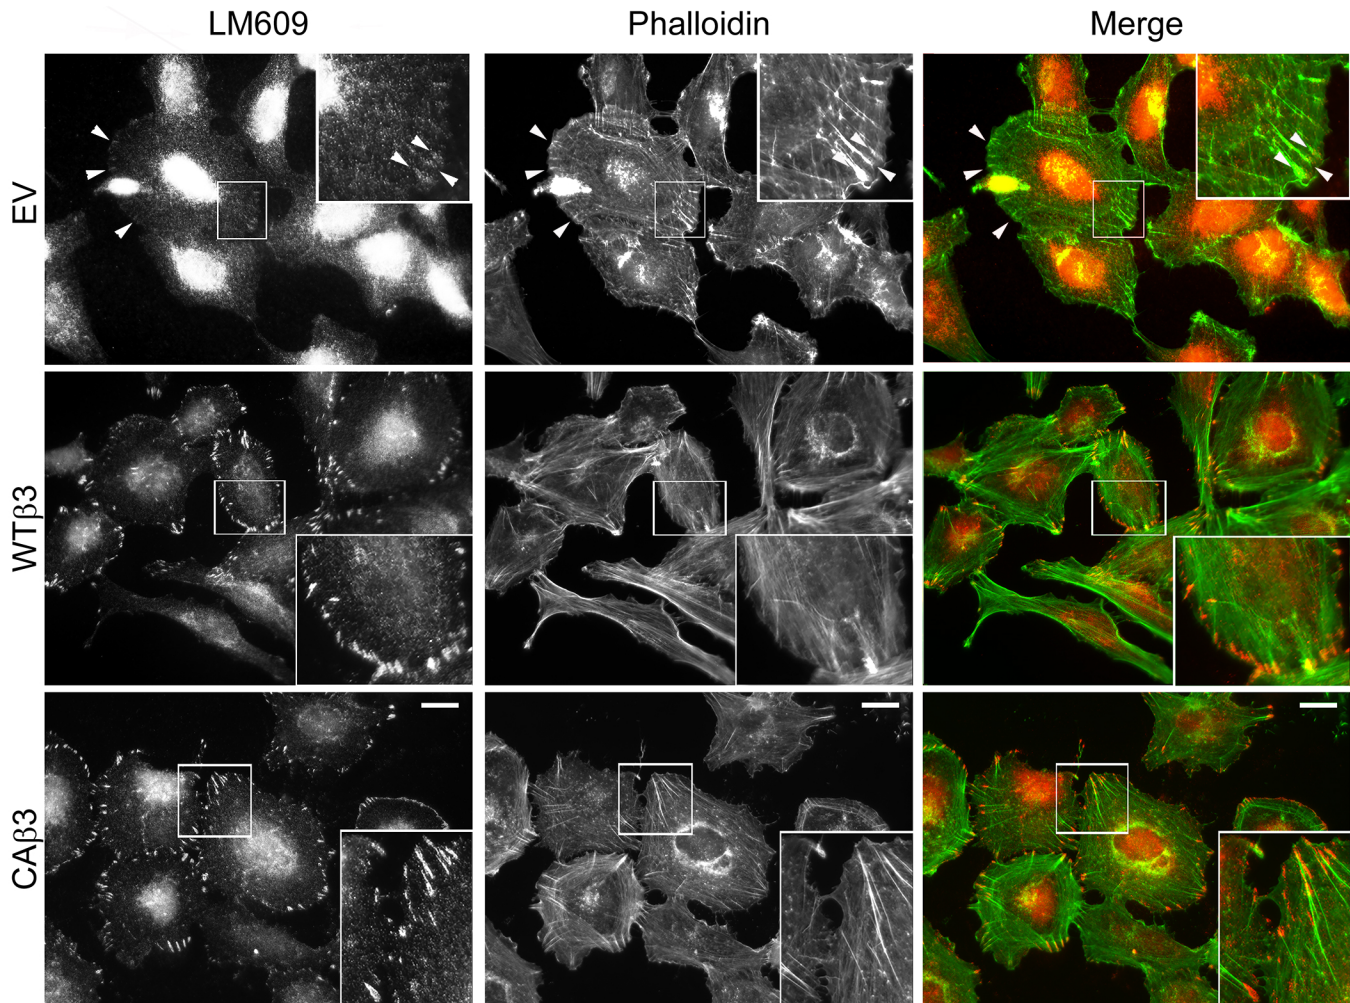

**Figure S4. Localization of LM609-positive focal adhesions ( $\alpha\text{v}\beta\text{3}$  integrin) and F-actin in EV, WT $\beta\text{3}$  and CA $\beta\text{3}$  cells.** Subconfluent cells were plated onto glass coverslips as described for Figures 5 and 6 prior to fixation in 4% paraformaldehyde and double labeling with mAb LM609 (red channel) and AlexaFluor®488-phalloidin (green channel). LM609-positive structures were typically found at the termini of actin stress fibers consistent with their identity as focal adhesions. Insets are enlarged areas highlighted by boxes. Arrow heads indicate faintly labeled LM609-positive adhesions in an EV cell. Scale bars = 50  $\mu\text{m}$ .
