# Supplementary material for: Activation of αvβ3 Integrin Alters Fibronectin Fibril Formation in Human Trabecular Meshwork Cells in a ROCK-Independent Manner
Source: PubMed Central journal article supplement — Invest Ophthalmol Vis Sci. 2019 Sep;60(12):3897–913. doi: 10.1167/iovs.19-27171 (PMC6750892; doi:10.1167/iovs.19-27171), 2019-09
Supplement: iovs-60-12-02_s05.pdf [file iovs-60-12-02_s05.pdf]

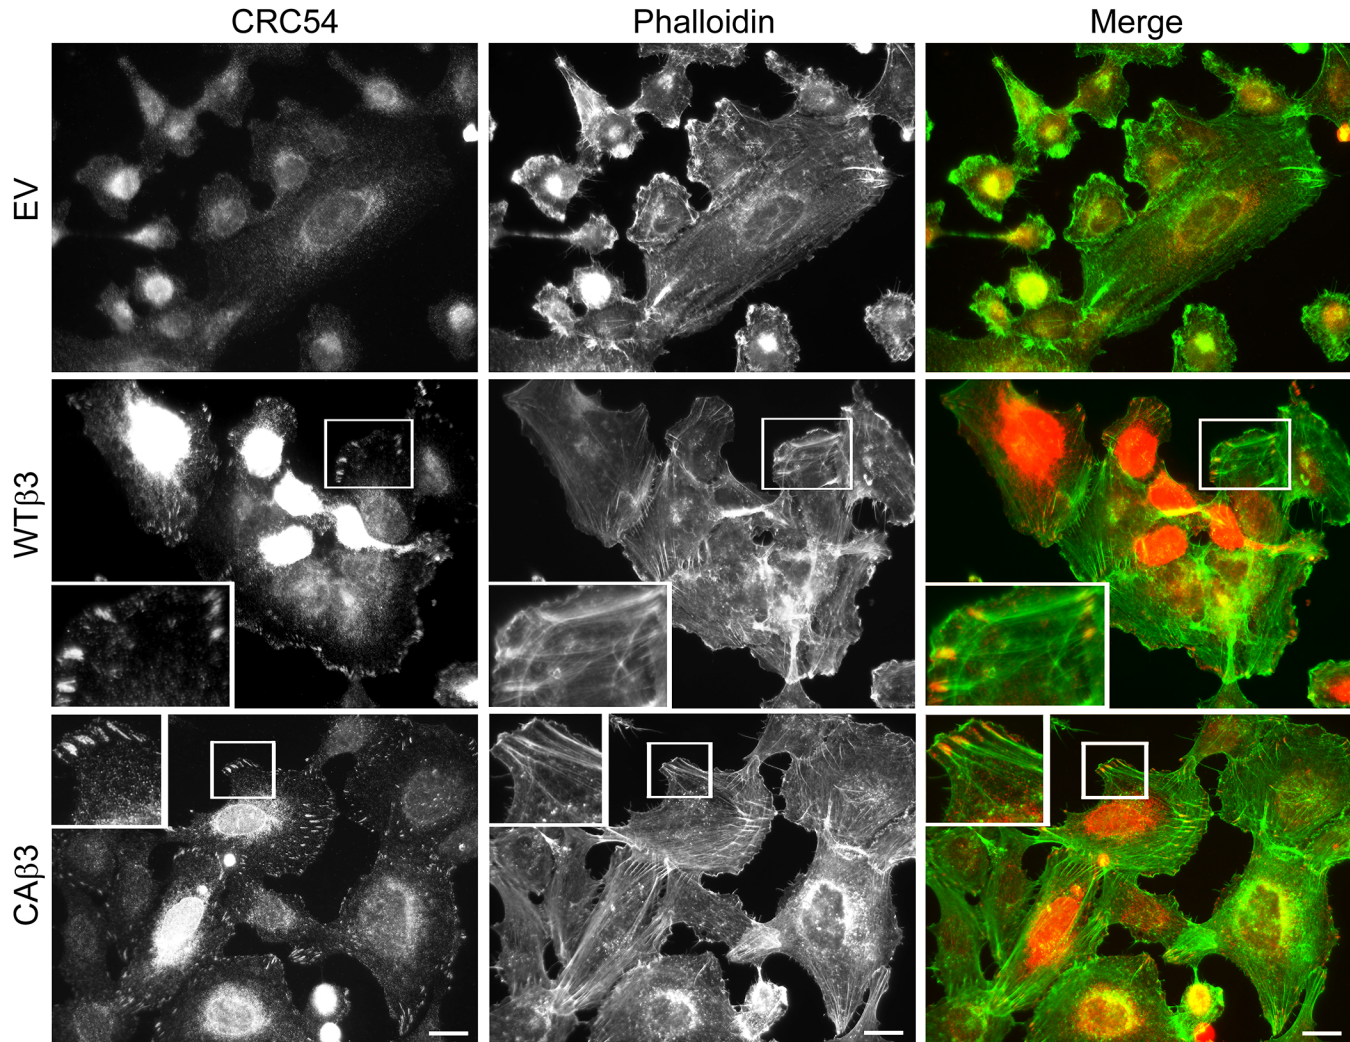

**Figure S5. Localization of CRC54-positive focal adhesions (activated  $\alpha\beta3$  integrin) and F-actin in EV, WT $\beta3$  and CA $\beta3$  cells.** Subconfluent cells were plated onto glass coverslips as described in Figures 5 and 6 prior to fixation in 4% paraformaldehyde and double-labeling with mAb CRC54 (red channel) and AlexaFluor®488-phalloidin (green channel). CRC54-positive structures were typically found at the termini of actin stress fibers consistent with their identity as focal adhesions. Insets are enlarged areas highlighted by boxes. EV cells failed to demonstrated any CRC54-positive adhesions. They also demonstrated few actin stress fibers. Scale bars = 50  $\mu$ m.
