# Supplementary material for: Activation of αvβ3 Integrin Alters Fibronectin Fibril Formation in Human Trabecular Meshwork Cells in a ROCK-Independent Manner
Source: PubMed Central journal article supplement — Invest Ophthalmol Vis Sci. 2019 Sep;60(12):3897–913. doi: 10.1167/iovs.19-27171 (PMC6750892; doi:10.1167/iovs.19-27171), 2019-09
Supplement: iovs-60-12-02_s06.pdf [file iovs-60-12-02_s06.pdf]

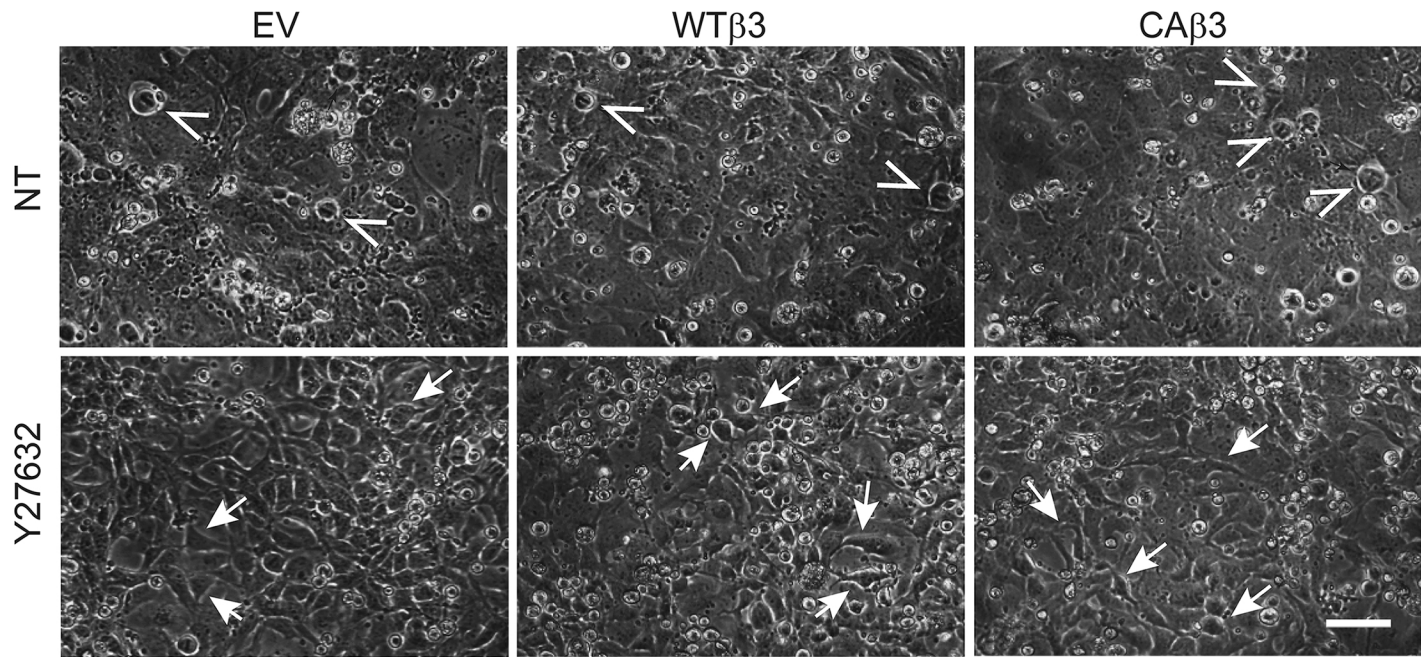

**Figure S6. Phase microscopy images of intact, confluent monolayers of EV, WTβ3 and CAβ3 cells treated with or without 5  $\mu$ M Y27632 for 24 hr. Arrows indicate examples of inhibitor-treated cells that demonstrate retraction or rounding that are absent in untreated cells. Arrowheads indicate rounded, untreated cells that are undergoing cell division as evidenced by mitotic figures. Scale bar = 50  $\mu$ m.**
