# Supplementary material for: Activation of αvβ3 Integrin Alters Fibronectin Fibril Formation in Human Trabecular Meshwork Cells in a ROCK-Independent Manner
Source: PubMed Central journal article supplement — Invest Ophthalmol Vis Sci. 2019 Sep;60(12):3897–913. doi: 10.1167/iovs.19-27171 (PMC6750892; doi:10.1167/iovs.19-27171), 2019-09
Supplement: iovs-60-12-02_s07.pdf [file iovs-60-12-02_s07.pdf]

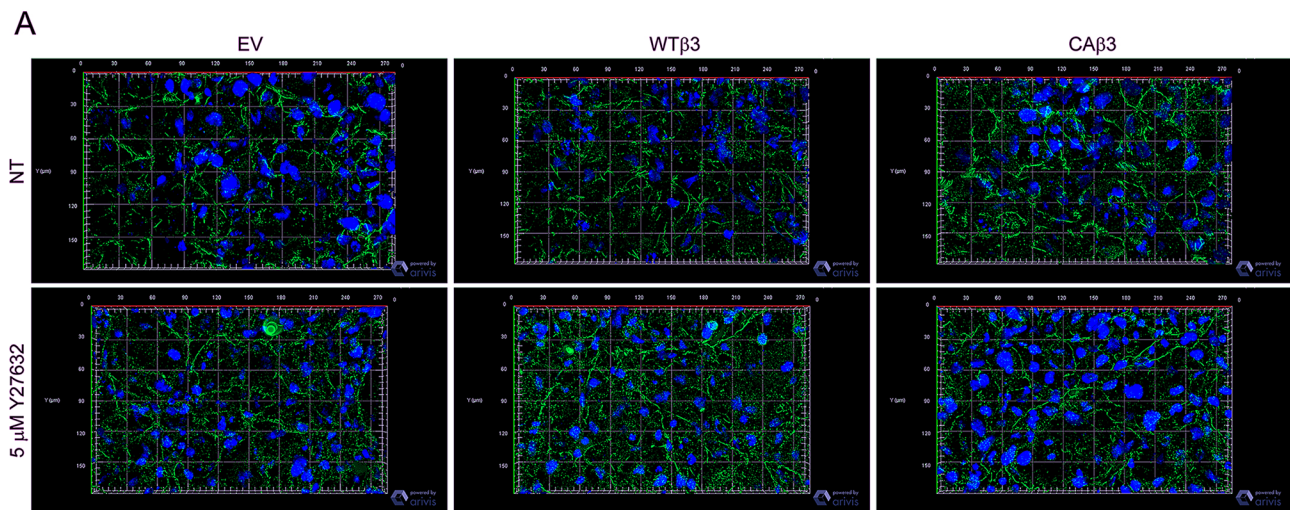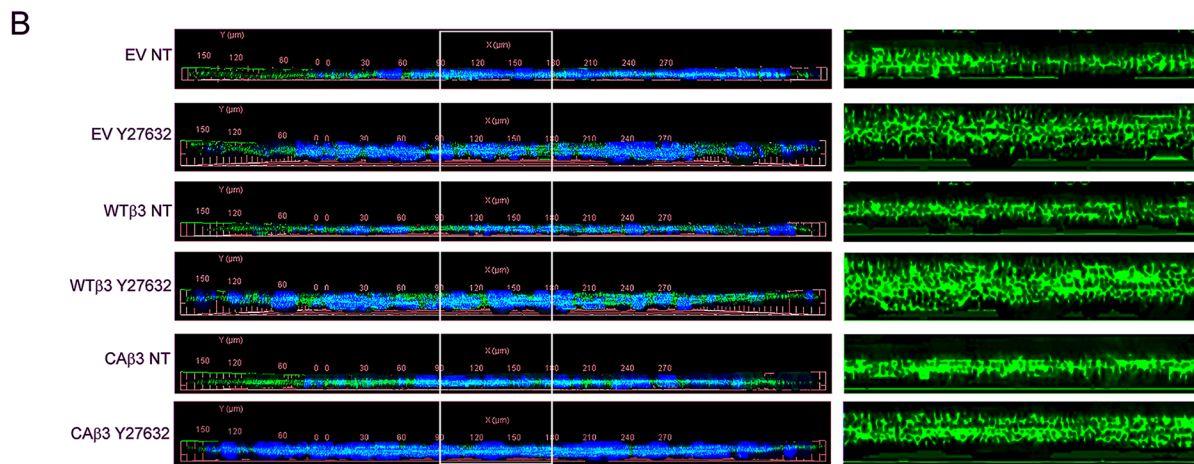

**Figure S7. 3D reconstruction of EV, WT $\beta$ 3 and CA $\beta$ 3 monolayers treated with or without 5  $\mu$ M Y27632 for 24 hr and double-labeled with rabbit fibronectin anti-sera and Hoechst 33342. A)** Inhibitor-treated cells and untreated cells were of comparable density as evidenced by the distribution of cell nuclei. Labeling for fibronectin fibrils remained relatively unchanged for all three cell lines in the presence of Y27632. **B)** An apparent increase in punctate fibronectin labeling was present in all inhibitor-treated cells. Viewing the 3D reconstructions laterally indicated that the punctate labeling was predominantly cytoplasmic in all three cell lines regardless of the presence or absence of the inhibitor. Enlarged areas of the lateral reconstructions in the left set of panels highlighted by the box are shown in the right set of panels. Only the fibronectin (green channel) is shown in the enlarged regions.
